# Supplementary material for: Prediction of histological grade using preoperative multi-sequence MRI-based radiomics signature in patients with non-small-cell lung cancer
Source: Research Square preprint supplement (doi:10.21203/rs.3.rs-109491/v1), 2020-12-02
Supplement: Supplementary file 1 [file 74a4d3a6a49502f10b5b730b.docx]

### Supplementary Materials

**Primary parameters of the multiparametric MRI performed**

All patients underwent MRI by using a 1.5 T scanner (MAGNETOM Aera, Siemens Medical Solutions, Erlangen) with an 8-channel phased-array torso coil. MRI sequences, including T2W and DW imaging sequences, were performed to obtain the corresponding images. The main parameters of the T2W sequence included: the sequence name “'t2_blade_fs_tra_p2_trig_320-LUNG”, TR 2200 ms, TE 86 ms, Slice thickness 5 mm, Space between slices 1 mm, FOV 350 mm × 350 mm. The main parameters of the DW sequence included: the sequence name “ep2d_diff_stir_b50_800_p2_TRACEW_DFC”, b value 50 and 800 s/mm2, TR 6800 ms, TE 63 ms, Slice thickness 5 mm, Space between slices 0.25 mm, FOV 400 mm × 400 mm.

The corresponding ADC maps were calculated using a custom-developed MATLAB R2015b package to solve the following equation:

where S(b800) and S(b50) represent the signal intensity of a certain voxel in the presence and absence of diffusion sensitization, respectively.
